# Supplementary material for: Carboxylated cyclofructan 6 as a hydrolytically stable high efficiency stationary phase for hydrophilic interaction liquid chromatography and mixed mode separations
Source: Royal Society of Chemistry journal article supplement (doi:10.1039/c6ay01246a), 2016-01-01
Supplement: c6ay01246a1.pdf [file c6ay01246a1.pdf]

**Carboxylated cyclofructan 6 as a hydrolytically stable high efficiency stationary phase for hydrophilic interaction liquid chromatography and mixed mode separations**

Yadi Wang, M. Farooq Wahab, Zachary S. Breitbach and Daniel W. Armstrong\*

*Department of Chemistry and Biochemistry, The University of Texas at Arlington,  
Arlington, TX 76019, USA*

Supplementary Information

Corresponding author: E-mail: [sec4dwa@uta.edu](mailto:sec4dwa@uta.edu); Tel.: +1 (817) 272-0632;

Fax: +1 (817) 272-0619

## Supporting information 1:

### Characteristics of the tested stationary phases from Irgum and Lucy.<sup>1, 2</sup>

| #                     | Brand name               | Manufacturer     | Support         | Functionality                            | Particle size (µm) | Pore size (Å) | Surface area (m <sup>2</sup> /g) | Column length (mm) | Column diameter (mm) |
|-----------------------|--------------------------|------------------|-----------------|------------------------------------------|--------------------|---------------|----------------------------------|--------------------|----------------------|
| Irgum's tested phases |                          |                  |                 |                                          |                    |               |                                  |                    |                      |
| 1                     | ZIC-HILIC                | Merck            | Silica          | Polymeric sulfoalkylbetaine zwitterionic | 5                  | 200           | 135                              | 100                | 4.6                  |
| 2                     | ZIC-HILIC                | Merck            | Silica          | Polymeric sulfoalkylbetaine zwitterionic | 3.5                | 200           | 135                              | 150                | 4.6                  |
| 3                     | ZIC-HILIC                | Merck            | Silica          | Polymeric sulfoalkylbetaine zwitterionic | 3.5                | 100           | 180                              | 150                | 4.6                  |
| 4                     | ZIC-pHILIC               | Merck            | Porous polymer  | Polymeric sulfoalkylbetaine zwitterionic | 5                  | –             | –                                | 50                 | 4.6                  |
| 5                     | Nucleodur HILIC          | Macherey-Nagel   | Silica          | Sulfoalkylbetaine zwitterionic           | 5                  | 110           | 340                              | 100                | 4.6                  |
| 6                     | PC HILIC                 | Shiseido         | Silica          | Phosphorylcholine zwitterionic           | 5                  | 100           | 450                              | 100                | 4.6                  |
| 7                     | TSKgel Amide 80          | Tosoh Bioscience | Silica          | Amide (polymeric carbamoyl)              | 5                  | 80            | 450                              | 100                | 4.6                  |
| 8                     | TSKgel Amide 80          | Tosoh Bioscience | Silica          | Amide (polymeric carbamoyl)              | 3                  | 80            | 450                              | 50                 | 4.6                  |
| 9                     | PolyHYDROXYETHYL A       | PolyLC           | Silica          | Poly(2-hydroxyethyl aspartamide)         | 5                  | 200           | 188                              | 100                | 4.6                  |
| 10                    | LiChrospher 100 Diol     | Merck            | Silica          | 2<comma>3-Dihydroxypropyl                | 5                  | 100           | 350                              | 125                | 4                    |
| 11                    | Luna HILIC               | Phenomenex       | Silica          | Cross-linked diol                        | 5                  | 200           | 185                              | 100                | 4.6                  |
| 12                    | PolySULFOETHYL A         | PolyLC           | Silica          | Poly(2-sulfoethyl aspartamide)           | 5                  | 200           | 188                              | 100                | 4.6                  |
| 13                    | Chromolith Si            | Merck            | Silica monolith | Underivatized                            | N/A                | 130           | 300                              | 100                | 4.6                  |
| 14                    | Atlantis HILIC Si        | Waters           | Silica          | Underivatized                            | 5                  | 100           | 330                              | 100                | 4.6                  |
| 15                    | Purospher STAR Si        | Merck            | Silica          | Underivatized                            | 5                  | 120           | 330                              | 125                | 4                    |
| 16                    | LiChrospher Si 100       | Merck            | Silica          | Underivatized                            | 5                  | 100           | 400                              | 125                | 4                    |
| 17                    | LiChrospher Si 60        | Merck            | Silica          | Underivatized                            | 5                  | 60            | 700                              | 125                | 4                    |
| 18                    | Cogent Type C Silica     | Microsolv        | Silica          | Silica hydride ("Type C" silica)         | 4                  | 100           | 350                              | 100                | 4.6                  |
| 19                    | LiChrospher 100 NH2      | Merck            | Silica          | 3-Aminopropyl                            | 5                  | 100           | 350                              | 125                | 4                    |
| 20                    | Purospher STAR NH2       | Merck            | Silica          | 3-Aminopropyl                            | 5                  | 120           | 330                              | 125                | 4                    |
| 21                    | TSKgel NH2-100           | Tosoh Bioscience | Silica          | Aminoalkyl                               | 3                  | 100           | 450                              | 50                 | 4.6                  |
| Lucy's tested phases  |                          |                  |                 |                                          |                    |               |                                  |                    |                      |
| 22                    | Atlantis HILIC           | Waters           | Silica          | Underivatized                            | 3                  | 100           | 330                              | 50                 | 1                    |
| 23                    | Onyx silica monolith     | Phenomenex       | Silica monolith | Underivatized                            | N/A                | 130           | 300                              | 100                | 4.6                  |
| 24                    | Zorbax HILIC plus        | Agilent          | Silica          | Underivatized                            | 3.5                | 95            | 160                              | 100                | 4.6                  |
| 25                    | Silica monolith coated w | Homemade         | Silica monolith | Silica-cationic nanoparticle             | N/A                | 130           | 300                              | 80                 | 4.6                  |
| 26                    | Zorbax RRHD HILIC plus   | Agilent          | Silica          | Underivatized                            | 1.8                | 95            | 160                              | 100                | 3                    |
| 27                    | Acclaim Trinity P1       | Dionex           | Silica          | Silica-cationic nanoparticle             | 3                  | –             | –                                | 150                | 3                    |
| 28                    | Cosmosil HILIC           | Nacalai          | Silica          | Triazole                                 | 5                  | 120           | 300                              | 150                | 4.6                  |
| 29                    | Acclaim HILIC-10         | Dionex           | Silica          | Proprietary neutral polar functionality  | 3                  | 120           | 300                              | 150                | 4.6                  |
| 30                    | Zorbax Eclipse XDB-C18   | Agilent          | Silica          | Octadecyl                                | 5                  | 80            | 180                              | 150                | 4.6                  |
| 31                    | XBridge C18              | Waters           | Silica (BEH)    | Octadecyl                                | 5                  | 130           | 185                              | 150                | 4.6                  |
| 32                    | YMC Pro C18              | YMC              | Silica          | Octadecyl                                | 3                  | 120           | 340                              | 150                | 2                    |
| 33                    | Zorbax SB-aq             | Agilent          | Silica          | Octadecyl                                | 3.5                | 80            | 180                              | 150                | 2.1                  |

## References:

1. N. P. Dinh, T. Jonsson and K. Irgum, *Journal of Chromatography A*, 2011, **1218**, 5880-5891.
2. M. E. A. Ibrahim, Y. Liu and C. A. Lucy, *Journal of Chromatography A*, 2012, **1260**, 126-131.
